# Supplementary material
Source: PubMed Central journal article supplement (PMC2693158)
Supplement: emboj200989s1.pdf [file emboj200989s1.pdf]

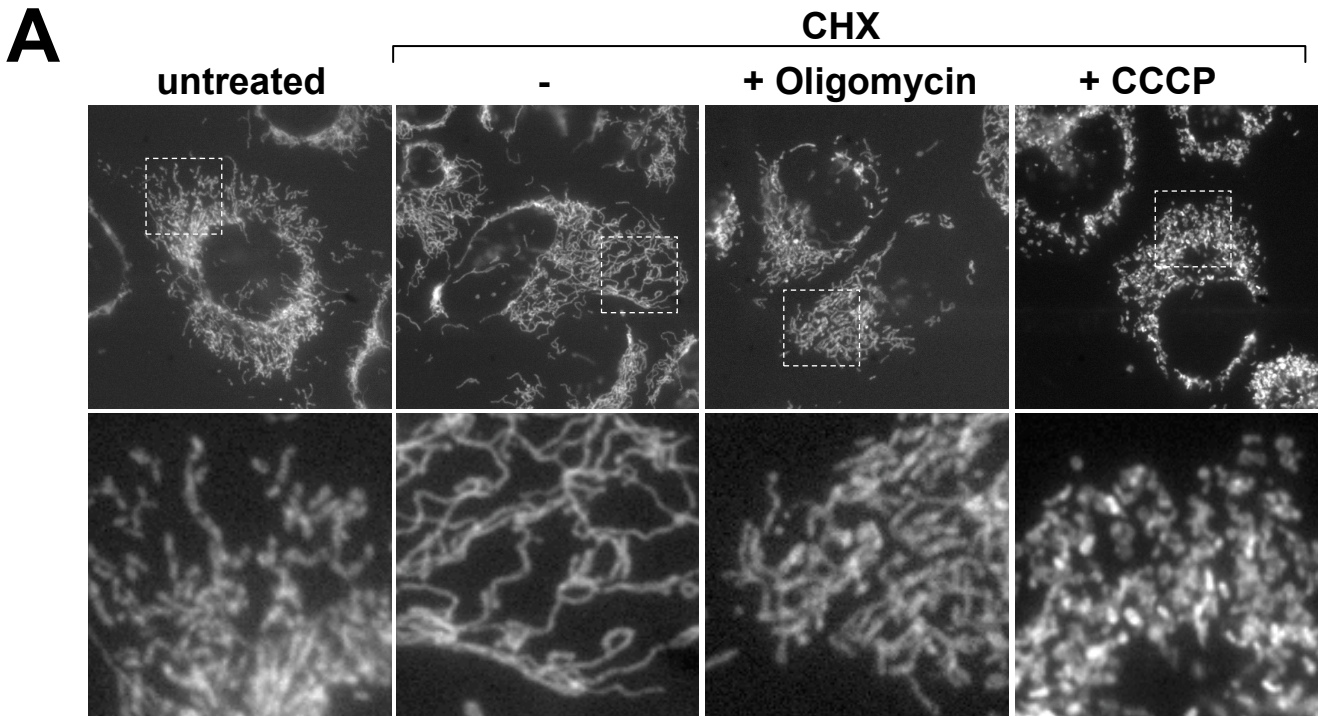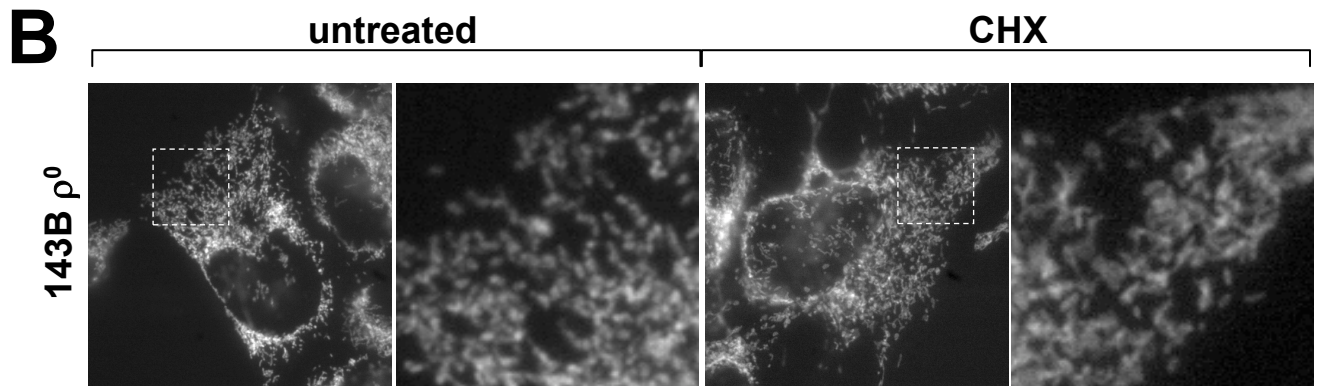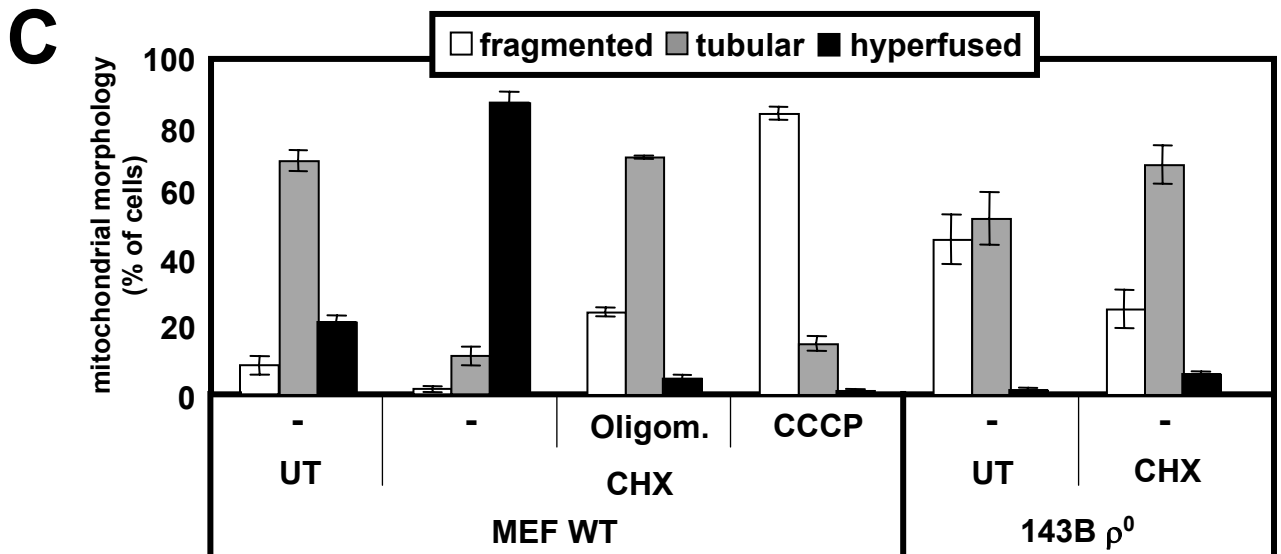

untreated

CHX

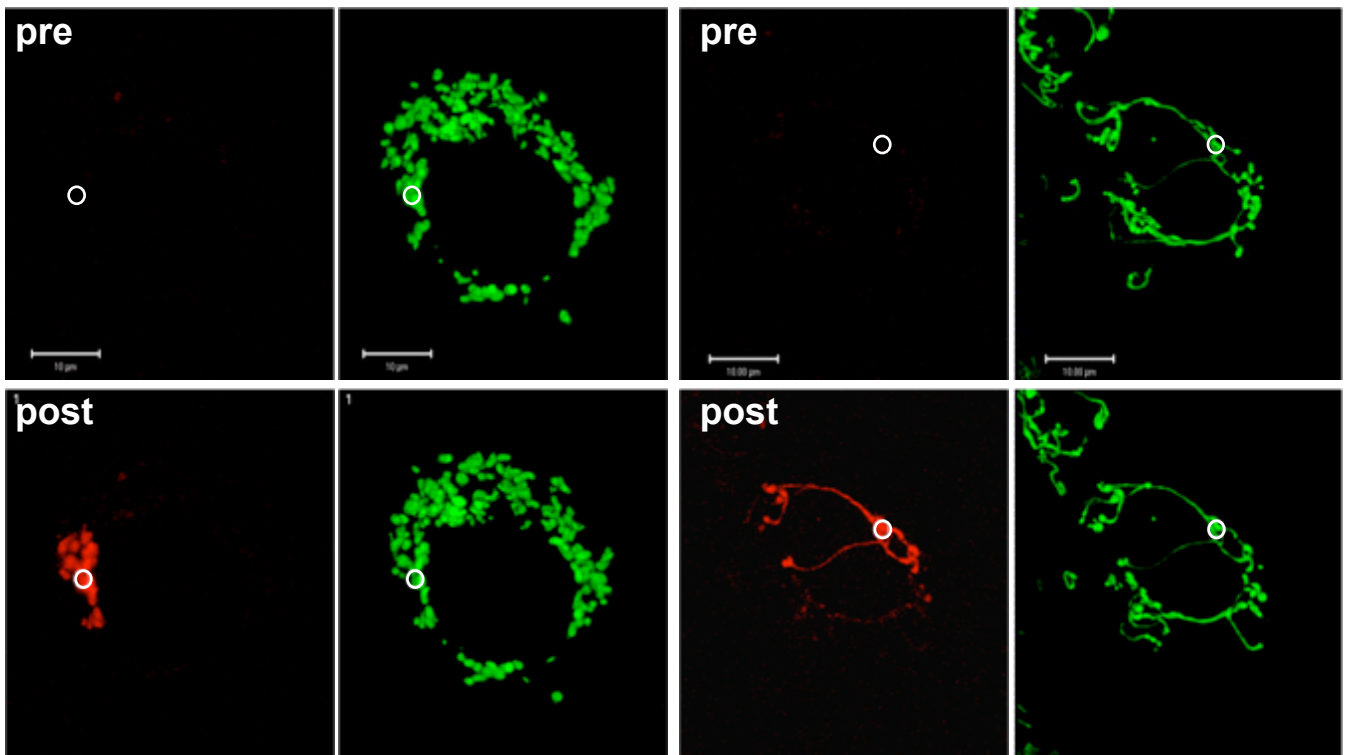

Tondera *et al.*  
Supplementary figure 2

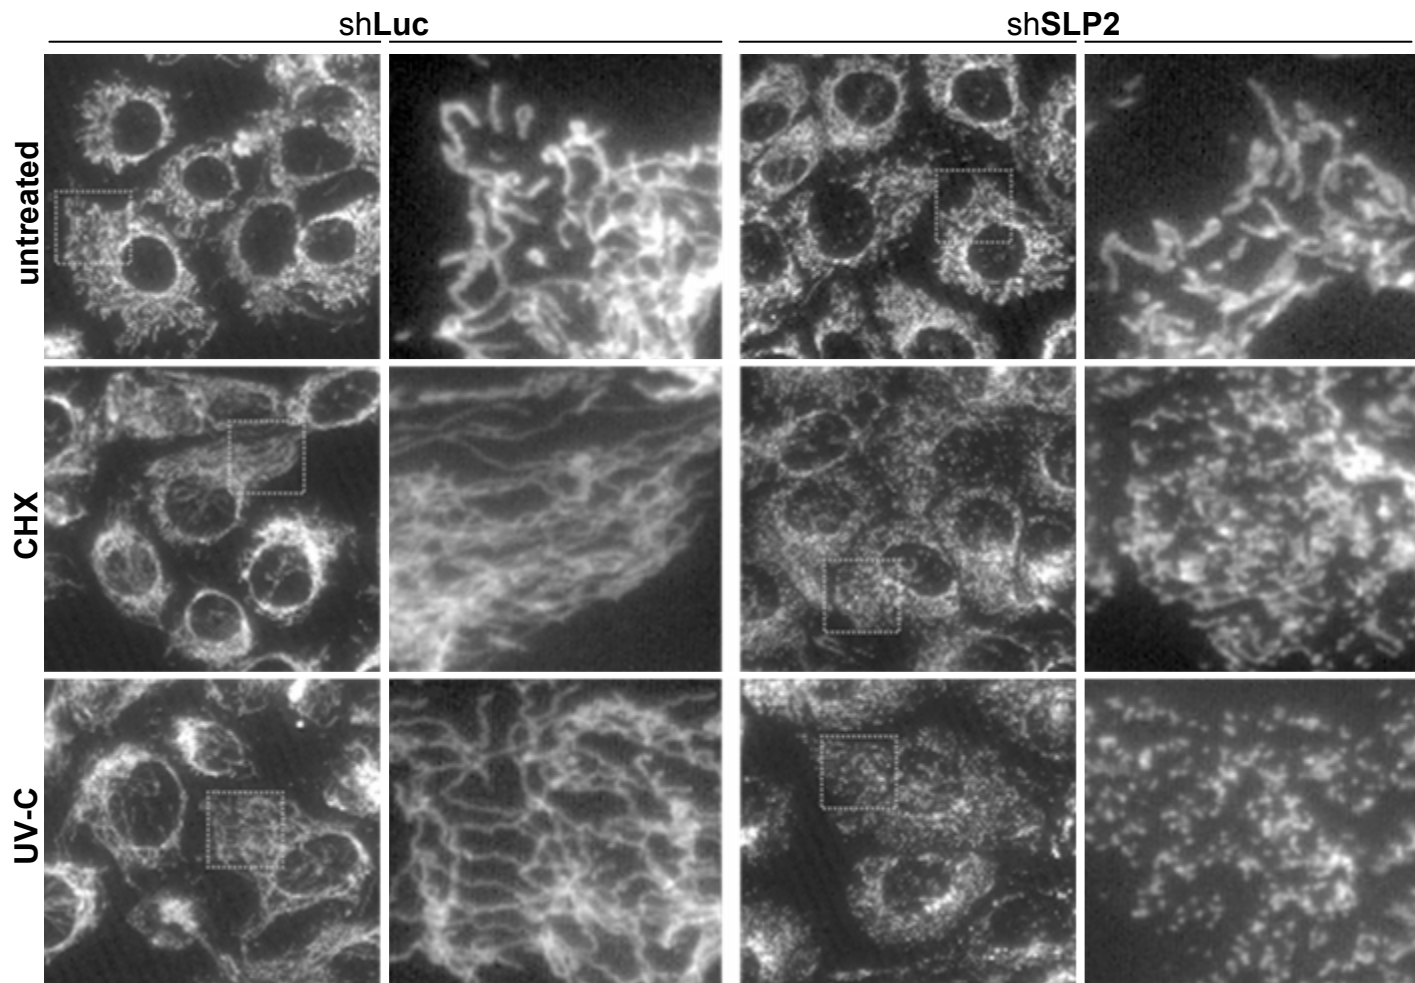

Tondera *et al.*  
Supplementary figure 3

**A**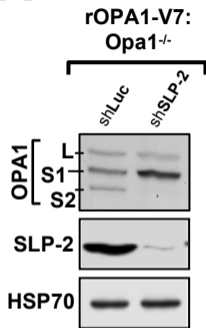**B**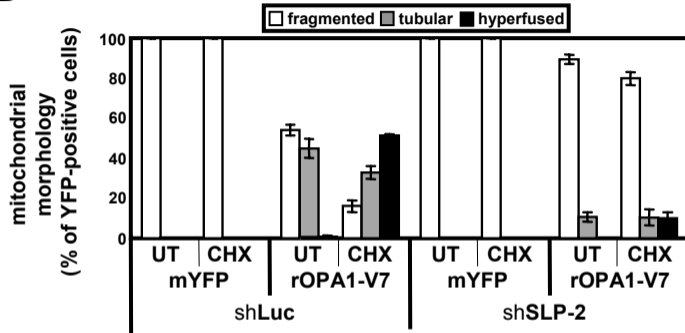

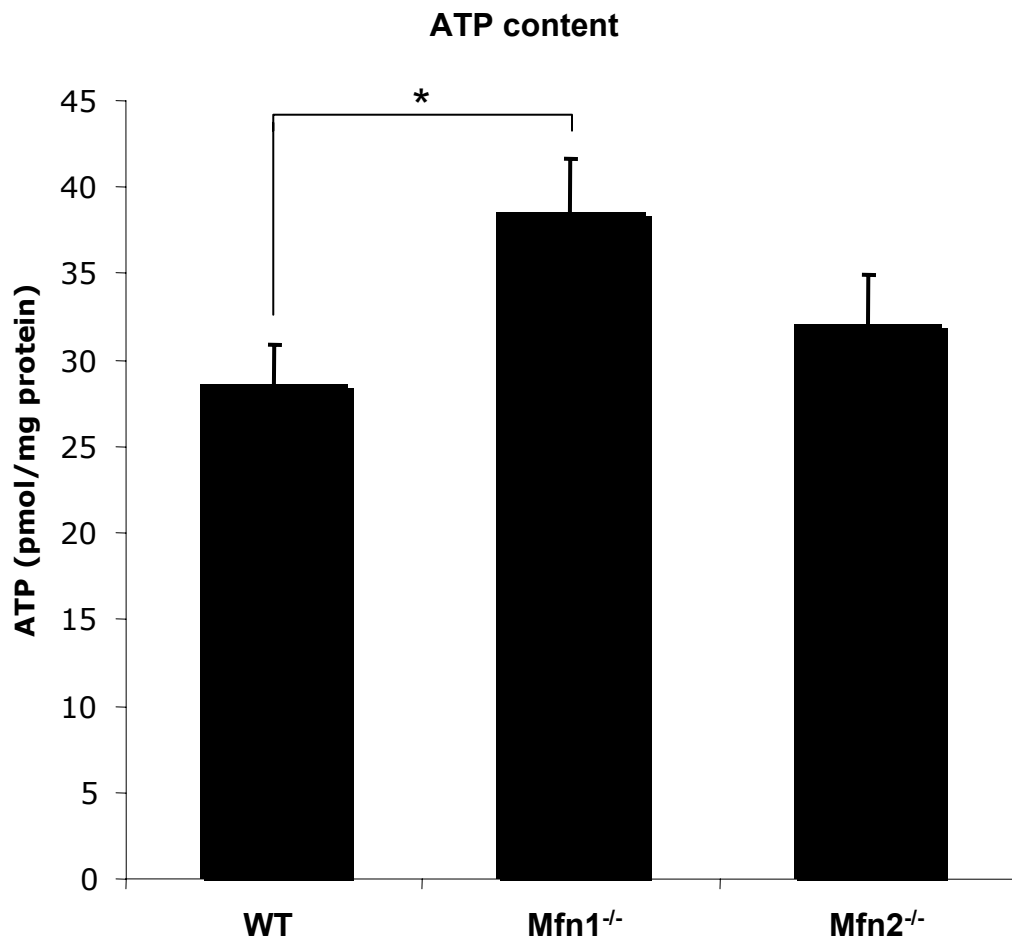

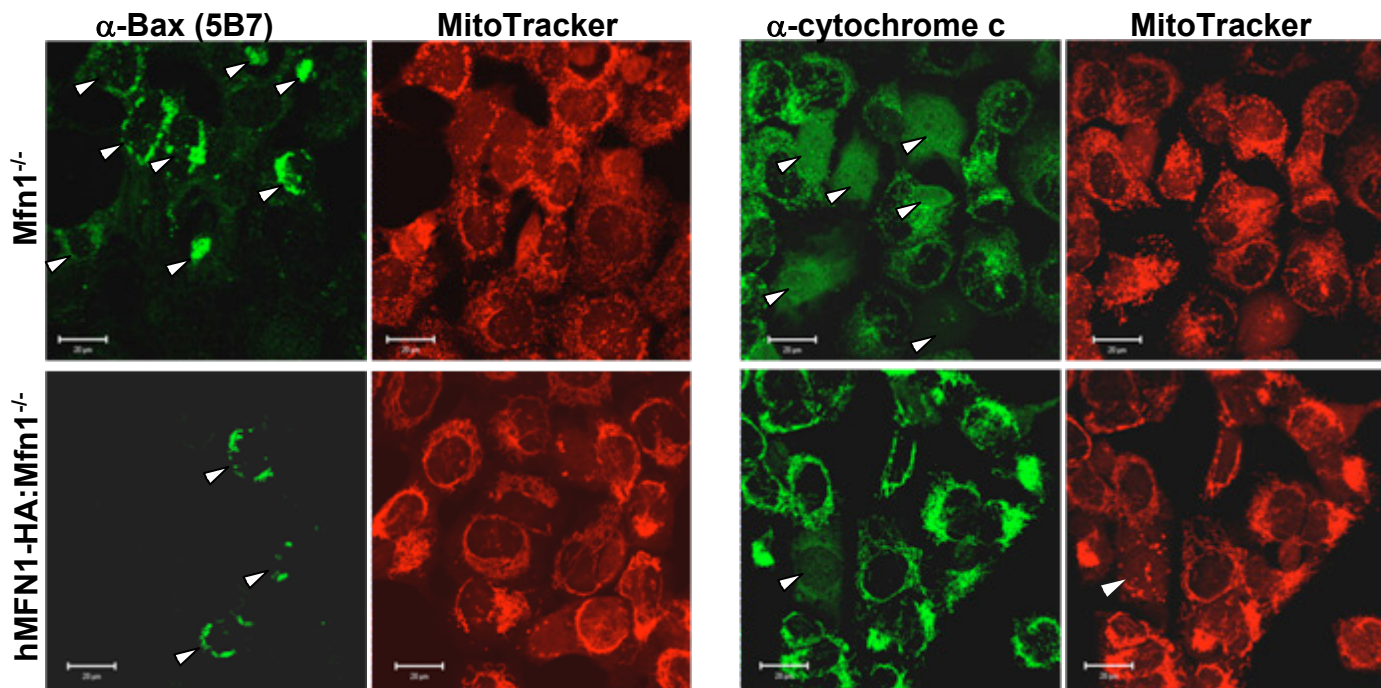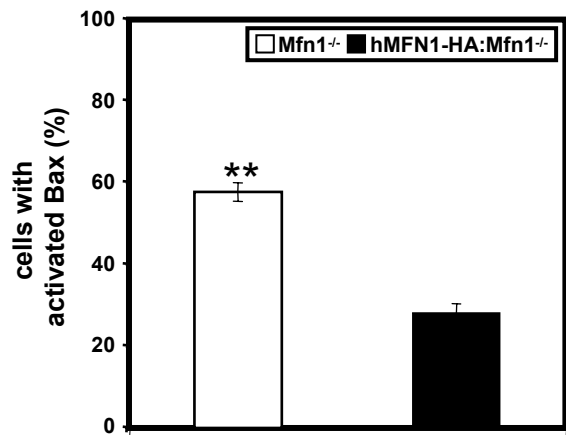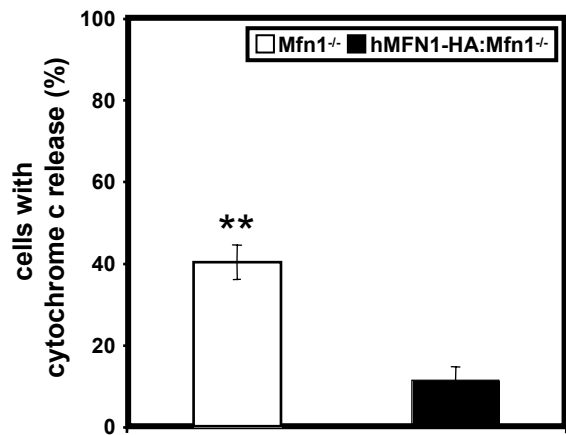

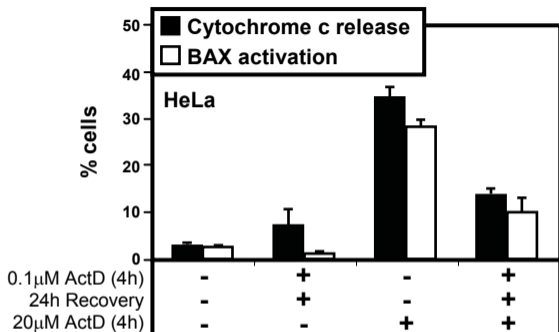

Tondera *et al.*  
 Supplementary figure 7
